# Supplementary material for: Intermolecular Interactions of Edaravone in Aqueous Solutions of Ethaline and Glyceline Inferred from Experiments and Quantum Chemistry Computations
Source: MDPI journal article supplement (doi:10.3390/molecules28020629), 2023-01-07
Supplement: s1 [file s1]

# Supplementary Materials for Intermolecular interactions of Edaravone in aqueous solutions of Ethaline and Glyceline inferred from experiments and quantum chemistry computations.

Piotr Cysewski <sup>1\*</sup>, Tomasz Jeliński <sup>1</sup>, Maciej Przybyłek <sup>1</sup>

<sup>1</sup> Department of Physical Chemistry, Pharmacy Faculty, Collegium Medicum of Bydgoszcz, Nicolaus Copernicus University in Toruń, Kurpińskiego 5, 85-096 Bydgoszcz, Poland

\* Correspondence: Piotr.Cysewski@cm.umk.pl

**Table S1.** The solubility of edaravone dissolved in mixtures of water and DES comprising choline chloride and glycerol in 1:2 molar ratio (GLE) at various temperatures. Values expressed as mole fractions ( $x_E$ ,  $\cdot 10^4$ ) and concentrations ( $c_E$ ,  $mg/ml$ ). Standard deviation values are given in parentheses.

| $x_{GLE}^*$ | 298.15 K               |                       | 303.15 K               |                       | 308.15 K               |                      | 313.15 K               |                      |
|-------------|------------------------|-----------------------|------------------------|-----------------------|------------------------|----------------------|------------------------|----------------------|
|             | $x_E (\cdot 10^4)$     | $c_E (mg/ml)$         | $x_E (\cdot 10^4)$     | $c_E (mg/ml)$         | $x_E (\cdot 10^4)$     | $c_E (mg/ml)$        | $x_E (\cdot 10^4)$     | $c_E (mg/ml)$        |
| <b>0.0</b>  | 1.73( $\pm 0.01$ )     | 1.72( $\pm 0.01$ )    | 1.78( $\pm 0.01$ )     | 1.79( $\pm 0.02$ )    | 1.84( $\pm 0.02$ )     | 1.87( $\pm 0.01$ )   | 1.93( $\pm 0.01$ )     | 1.96( $\pm 0.01$ )   |
| <b>0.2</b>  | 235.51( $\pm 9.67$ )   | 115.11( $\pm 4.41$ )  | 309.2( $\pm 4.30$ )    | 148.29( $\pm 1.98$ )  | 435.07( $\pm 4.04$ )   | 201.28( $\pm 1.21$ ) | 564.61( $\pm 7.05$ )   | 251.54( $\pm 2.67$ ) |
| <b>0.4</b>  | 743.88( $\pm 5.92$ )   | 233.13( $\pm 1.43$ )  | 1116.64( $\pm 2.70$ )  | 328.49( $\pm 0.84$ )  | 1444.07( $\pm 14.86$ ) | 402.14( $\pm 2.73$ ) | 2014.09( $\pm 17.34$ ) | 513.56( $\pm 2.32$ ) |
| <b>0.5</b>  | 1121.47( $\pm 10.85$ ) | 298.98( $\pm 3.19$ )  | 1673.69( $\pm 20.61$ ) | 414.6( $\pm 3.61$ )   | 2236.41( $\pm 28.00$ ) | 517.95( $\pm 3.12$ ) | 3065.17( $\pm 55.82$ ) | 646.93( $\pm 6.00$ ) |
| <b>0.6</b>  | 1450.22( $\pm 11.26$ ) | 344.22( $\pm 2.54$ )  | 2089.77( $\pm 58.10$ ) | 464.06( $\pm 10.07$ ) | 2723.73( $\pm 61.99$ ) | 567.03( $\pm 8.81$ ) | 3567.08( $\pm 42.51$ ) | 691.57( $\pm 4.95$ ) |
| <b>0.8</b>  | 1305.70( $\pm 26.15$ ) | 265.81( $\pm 4.17$ )  | 1852.98( $\pm 39.43$ ) | 363.68( $\pm 5.58$ )  | 2525.56( $\pm 24.65$ ) | 471.98( $\pm 3.89$ ) | 3420.95( $\pm 31.16$ ) | 602.41( $\pm 4.73$ ) |
| <b>1.0</b>  | 1052.85( $\pm 68.85$ ) | 191.06( $\pm 11.91$ ) | 1606.43( $\pm 50.52$ ) | 282.25( $\pm 8.03$ )  | 2151.57( $\pm 64.56$ ) | 369.09( $\pm 11.3$ ) | 2991.42( $\pm 64.10$ ) | 492.12( $\pm 9.58$ ) |

**Table S2.** The solubility of edaravone dissolved in mixtures of water and DES comprising choline chloride and ethylene glycol in 1:2 molar ratio (ETA) at various temperatures. Values expressed as mole fractions ( $x_E$ ,  $\cdot 10^4$ ) and concentrations ( $c_E$ ,  $mg/ml$ ). Standard deviation values are given in parentheses.

| $x_{ETA}^*$ | 298.15 K               |                       | 303.15 K               |                      | 308.15 K                |                       | 313.15 K                |                       |
|-------------|------------------------|-----------------------|------------------------|----------------------|-------------------------|-----------------------|-------------------------|-----------------------|
|             | $x_E (\cdot 10^4)$     | $c_E (mg/ml)$         | $x_E (\cdot 10^4)$     | $c_E (mg/ml)$        | $x_E (\cdot 10^4)$      | $c_E (mg/ml)$         | $x_E (\cdot 10^4)$      | $c_E (mg/ml)$         |
| <b>0.0</b>  | 1.73( $\pm 0.01$ )     | 1.72( $\pm 0.01$ )    | 1.78( $\pm 0.01$ )     | 1.79( $\pm 0.02$ )   | 1.84( $\pm 0.02$ )      | 1.87( $\pm 0.01$ )    | 1.93( $\pm 0.01$ )      | 1.96( $\pm 0.01$ )    |
| <b>0.2</b>  | 454.10( $\pm 5.48$ )   | 220.96( $\pm 2.27$ )  | 574.18( $\pm 8.89$ )   | 269.62( $\pm 3.62$ ) | 742.26( $\pm 18.45$ )   | 331.05( $\pm 6.32$ )  | 890.33( $\pm 10.84$ )   | 381.65( $\pm 3.10$ )  |
| <b>0.4</b>  | 1353.93( $\pm 5.00$ )  | 406.66( $\pm 1.15$ )  | 1819.02( $\pm 41.45$ ) | 505.10( $\pm 7.17$ ) | 2386.29( $\pm 27.09$ )  | 602.61( $\pm 3.89$ )  | 2954.32( $\pm 49.04$ )  | 683.73( $\pm 5.94$ )  |
| <b>0.5</b>  | 1754.56( $\pm 31.02$ ) | 456.55( $\pm 6.04$ )  | 2316.25( $\pm 38.27$ ) | 554.20( $\pm 5.35$ ) | 3073.71( $\pm 53.04$ )  | 663.59( $\pm 6.82$ )  | 3822.75( $\pm 61.93$ )  | 743.62( $\pm 7.61$ )  |
| <b>0.6</b>  | 1934.93( $\pm 34.18$ ) | 459.69( $\pm 5.59$ )  | 2552.36( $\pm 52.56$ ) | 560.61( $\pm 8.87$ ) | 3306.79( $\pm 48.29$ )  | 670.27( $\pm 6.19$ )  | 3982.72( $\pm 70.26$ )  | 752.91( $\pm 6.66$ )  |
| <b>0.8</b>  | 1713.96( $\pm 31.15$ ) | 363.37( $\pm 5.15$ )  | 2241.64( $\pm 42.78$ ) | 451.55( $\pm 6.38$ ) | 2989.20( $\pm 42.33$ )  | 561.30( $\pm 6.00$ )  | 3720.80( $\pm 28.54$ )  | 655.40( $\pm 3.72$ )  |
| <b>1.0</b>  | 1579.47( $\pm 70.73$ ) | 302.96( $\pm 11.01$ ) | 2135.68( $\pm 42.46$ ) | 392.28( $\pm 6.53$ ) | 2878.22( $\pm 133.85$ ) | 499.02( $\pm 18.34$ ) | 3602.21( $\pm 117.41$ ) | 592.85( $\pm 14.78$ ) |
